# Supplementary material for: Compassionate Mind Training for Caregivers in Residential Youth Care: Investigating their Experiences Through a Thematic Analysis
Source: Springer Nature journal article supplement (doi:10.1007/s12671-023-02239-9), 2023-10-26
Supplement: MOESM1 [file 26229786]

**[Welcome and Instructions]**

**[Informed consent]**

**Questions**

1. To begin with, we are interested to know the experience of participation in the Compassionate Mind Training program with Caregivers. Could you please share your experience with us?
2. Considering learnings, practices or exercises carried out throughout the program, how did you apply them in your daily routine?

*Probes*

Specifically at a personal level, could you give me some examples?

Specifically at a professional level, could you give me some examples?

1. As a team, what changes did you make in the practices/routines/intervention at the residential care home after the program?
2. Now, we will pose some questions regarding your perception of change linked with your participation in this program. We would like to hear you talk about the extent to which your way of thinking (i.e., about difficulties, about yourself, others and the world) has changed as a result of your participation in this program.

*Probes*

Could you tell a little bit more about your way of thinking regarding others (empathy, judgment, blame)?

1. Now, we would like to know if your behavior has changed. If changes were noticed, we would like to understand how your behavior has changed in personal and interpersonal terms.

*Probes*

Specifically at the professional context, could you give me some examples?

1. To what extent has the CMT-Care Homes program helped you to deal with your emotional difficulties and how has this contributed to your well-being, job satisfaction and satisfaction with life?

*Probes*

How has this program helped you to deal with your emotions? Could you give me some examples?

Specifically at the professional level, to what extent has this program contributed to increasing your well-being and job satisfaction? Could you give me some examples?

1. Specifically, in what concerns the three flows of compassion, what differences do you perceive when comparing the beginning and end of this program?
2. In your opinion, how did the Compassionate Mind Training program help the team to deal with the challenges, demands and difficulties of this setting?
3. Regarding the relationships you establish with children and youth, what impact do you perceive in the quality of those relationships?
4. Regarding children and youth, is there any change in their behavior that can be attributed to the team participation in the program? If yes, what changes do you perceive in them?
5. In your opinion, what is the impact of the Compassionate Mind Training in the residential care home?

*Probes*

Specifically at the residential care home environment. Could you give me some examples?

Specifically on the relationship between colleagues. Could you give me some examples?

Specifically in the residential care home functioning (e.g., intervention, rules, routines). Could you give me some examples?

1. To conclude, we would like to know how you intend to keep using the lessons learned and/or the tools learned on the program at the residential care home?

**[Conclusion]**
